# Supplementary material for: CuET overcomes regorafenib resistance by inhibiting epithelial-mesenchymal transition through suppression of the ERK pathway in hepatocellular carcinoma
Source: PubMed Central journal article supplement — Transl Oncol. 2024 Jul 1;47:102040. doi: 10.1016/j.tranon.2024.102040 (PMC11267041; doi:10.1016/j.tranon.2024.102040), 2024-07-01

# Figure 2D

GAPDH

p-ERK1/2

t-ERK1/2

N-cadherin

vimentin

Cyclin B1

E-cadherin

snail

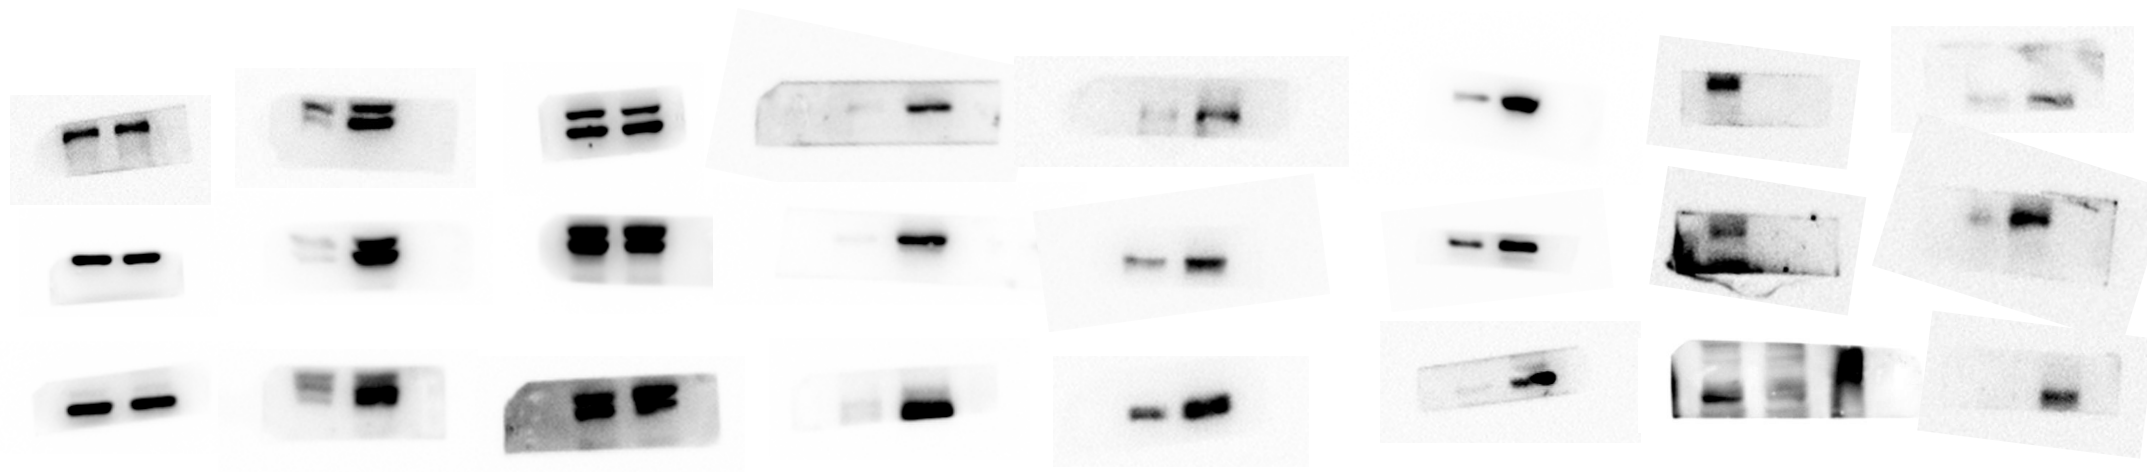

# Figure 3A

GAPDH

p-ERK1/2

t-ERK1/2

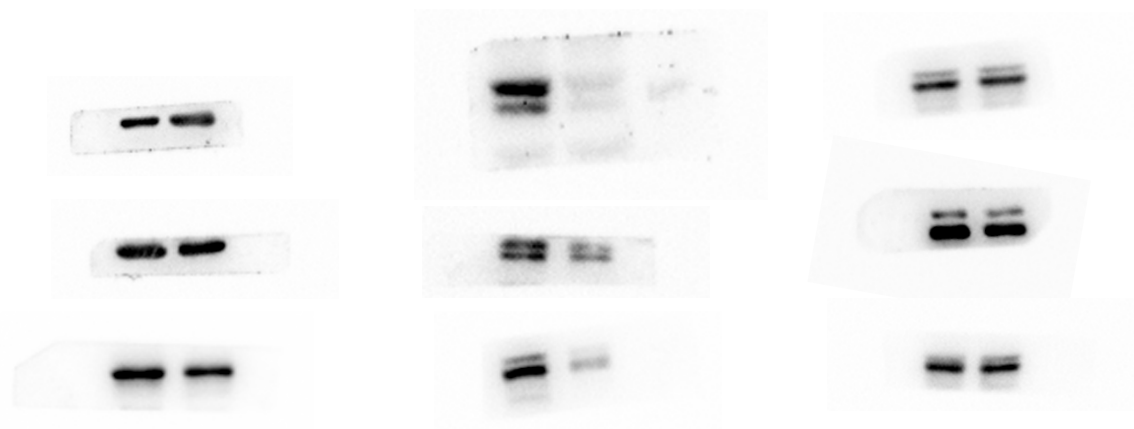

# Figure 3G

GAPDH

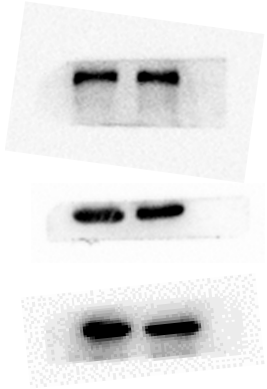

E-cadherin

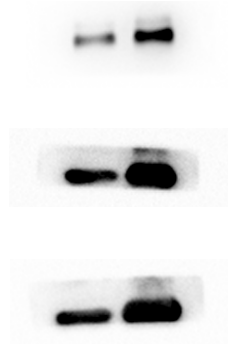

snail

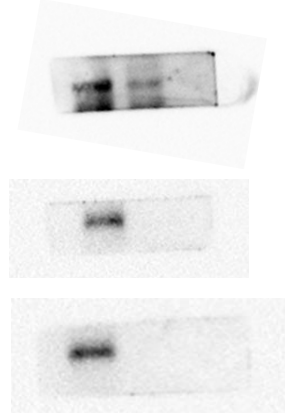

N-cadherin

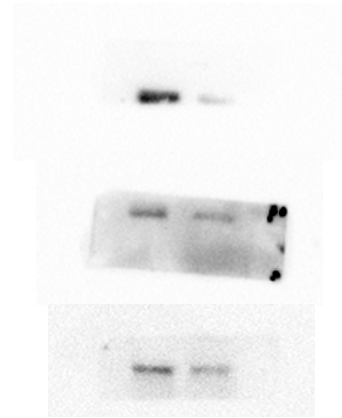

vimentin

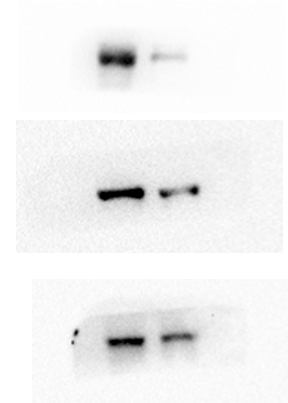

Cyclin B1

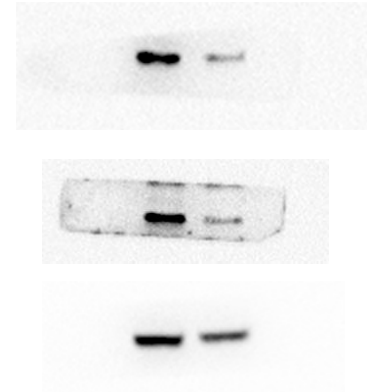

# Figure 4A MHCC-97H/REGO

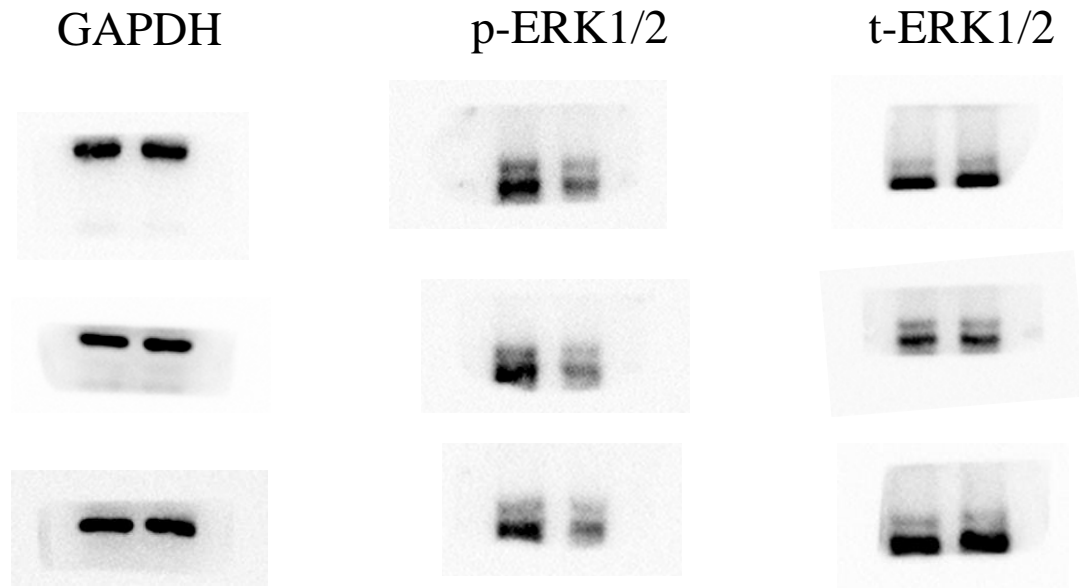

# Figure 4A MHCC-97H

GAPDH

p-ERK1/2

t-ERK1/2

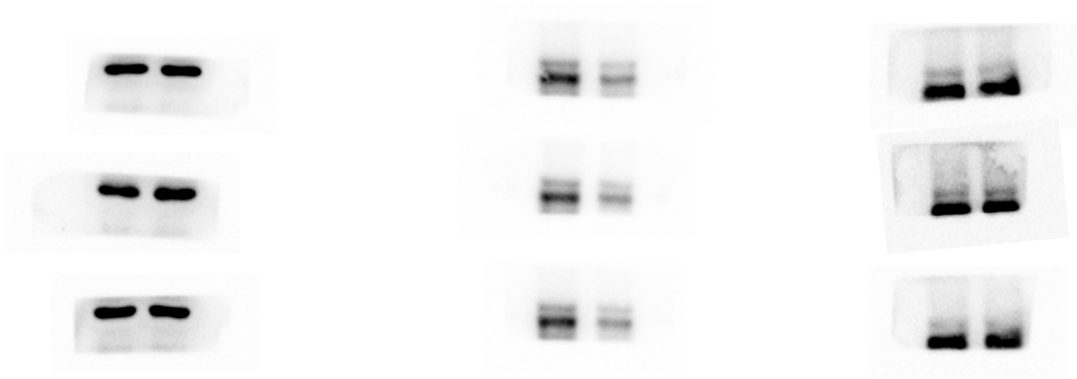

# Figure 4A SMCC-7721

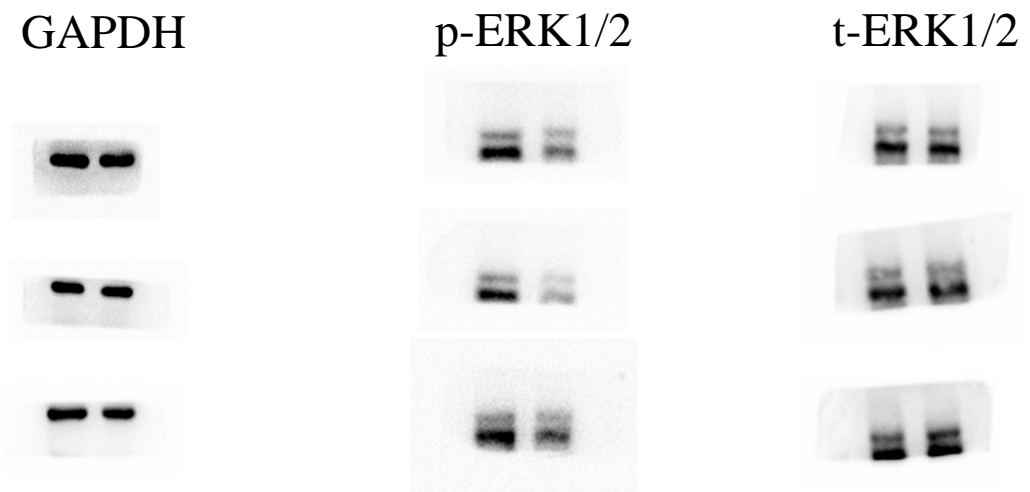

# Figure 4A MHCC-LM3

GAPDH

p-ERK1/2

t-ERK1/2

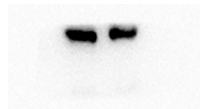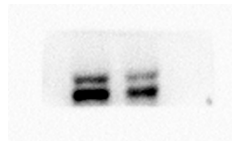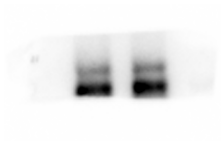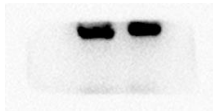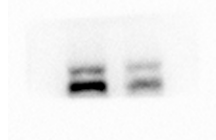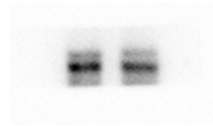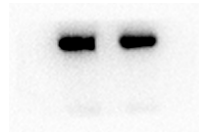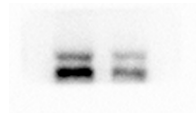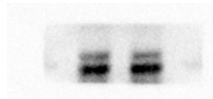

# Figure 4D MHCC-97H/REGO

GAPDH

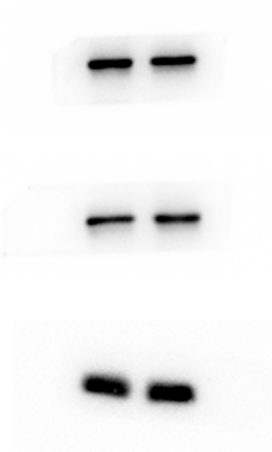

Cyclin B1

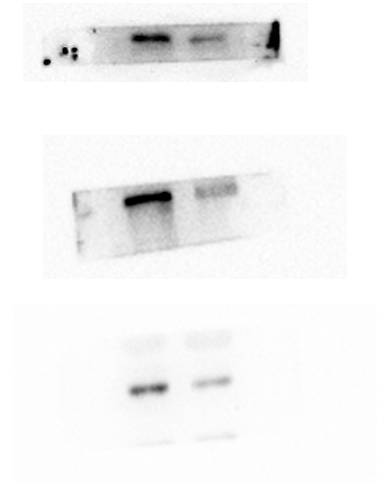



# Figure 4D MHCC-97H

GAPDH

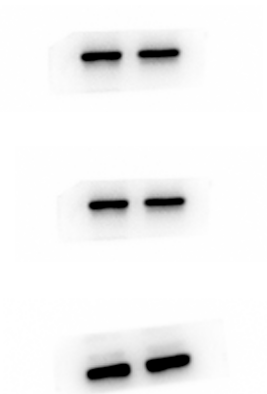

Cyclin B1

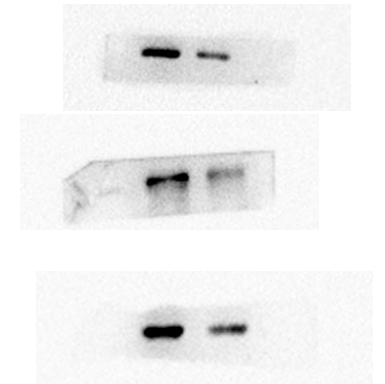

# Figure 4D SMCC-7721

GAPDH

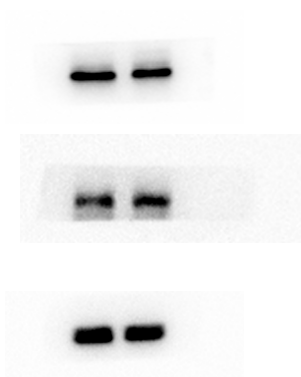

Cyclin B1

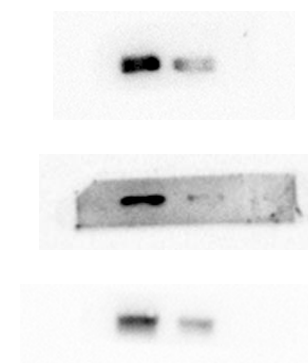

# Figure 4D MHCC-LM3

GAPDH

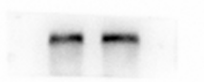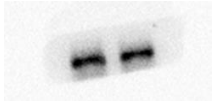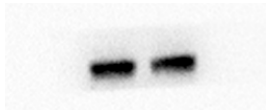

Cyclin B1

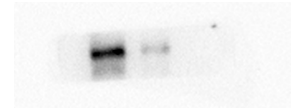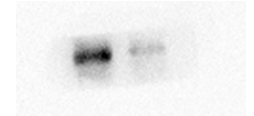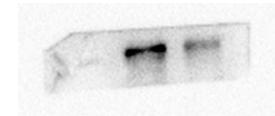

# Figure 4G MHCC-97H/REGO

GAPDH

E-cadherin

snail

N-cadherin

vimentin

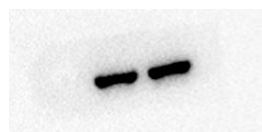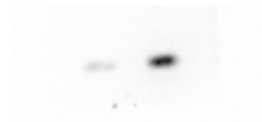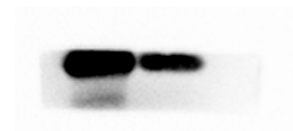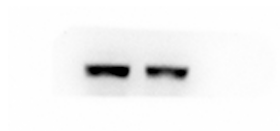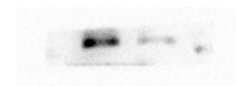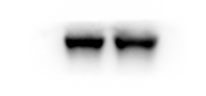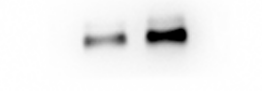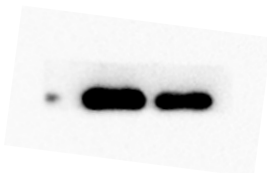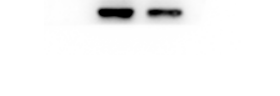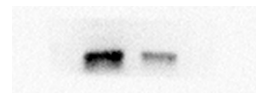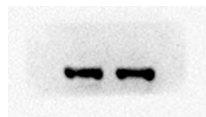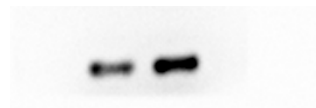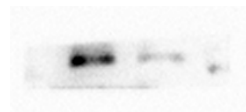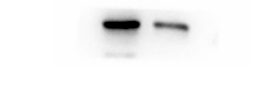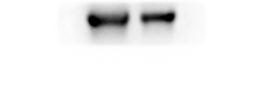

# Figure 4G MHCC-97H

GAPDH

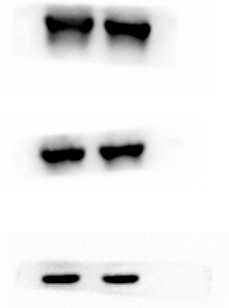

E-cadherin

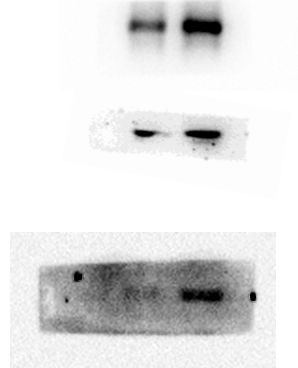

snail

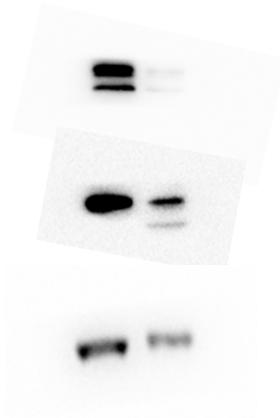

N-cadherin

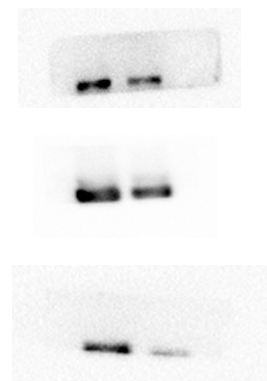

vimentin

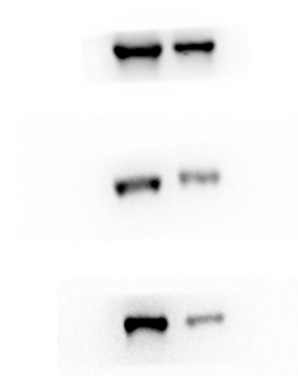

# Figure 4G SMCC-7721

GAPDH

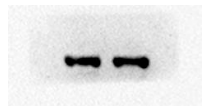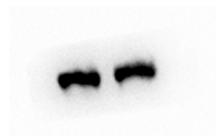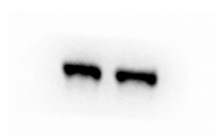

E-cadherin

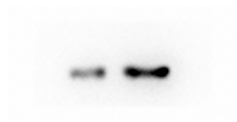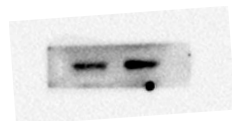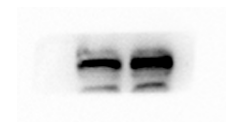

snail

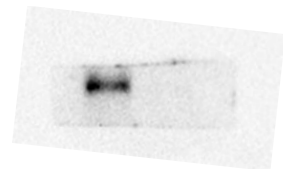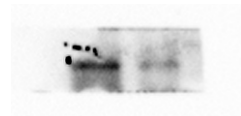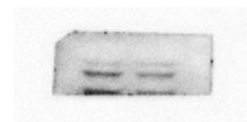

N-cadherin

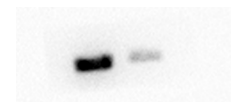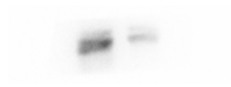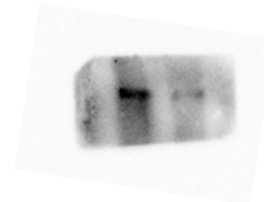

vimentin

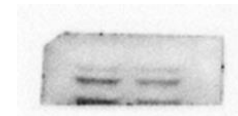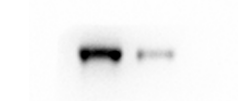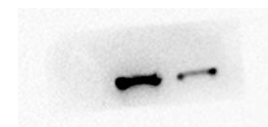

# Figure 4G MHCC-LM3

GAPDH

E-cadherin

snail

N-cadherin

vimentin

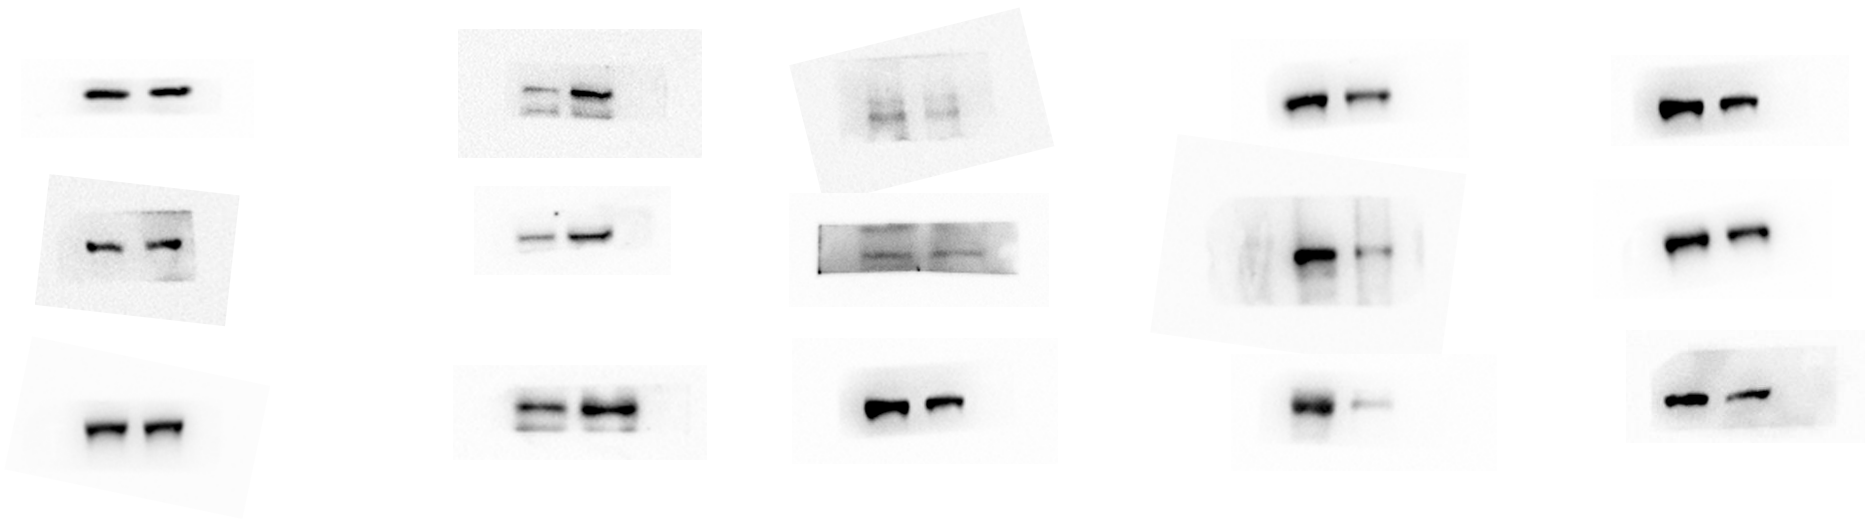

# Figure 5K

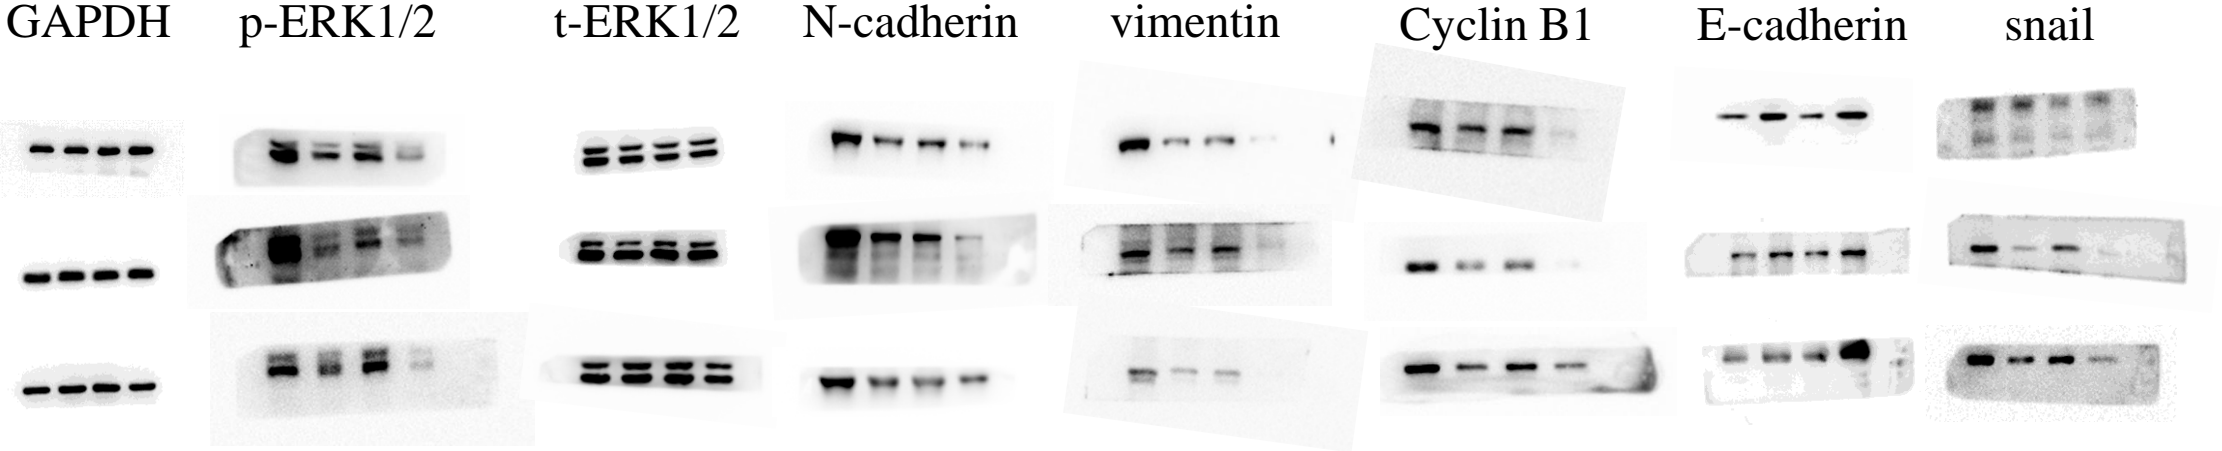

Supplement: mmc4.pdf [file mmc4.pdf]
