# Supplementary material for: CuET overcomes regorafenib resistance by inhibiting epithelial-mesenchymal transition through suppression of the ERK pathway in hepatocellular carcinoma
Source: PubMed Central journal article supplement — Transl Oncol. 2024 Jul 1;47:102040. doi: 10.1016/j.tranon.2024.102040 (PMC11267041; doi:10.1016/j.tranon.2024.102040), 2024-07-01
Supplement: mmc3.pdf [file mmc3.pdf]

This document certifies that the manuscript

**CuET Overcomes Regorafenib Resistance by Inhibiting Epithelial-Mesenchymal Transition through Suppression of the ERK Pathway in Hepatocellular Carcinoma**

prepared by the authors

**Ding Ma, Shuwen Liu, Kua Liu, Qinyu He, Lili Hu, Weiwei Shi, Yin Cao, Guang Zhang, Qilei Xin, Zhongxia Wang, Junhua Wu, Chunping Jiang**

was edited for proper English language, grammar, punctuation, spelling, and overall style by one or more of the highly qualified native English speaking editors at AJE.

This certificate was issued on **November 17, 2021** and may be verified on the [AJE website](#) using the verification code **6042-5905-B4BA-A29E-ED6P**.

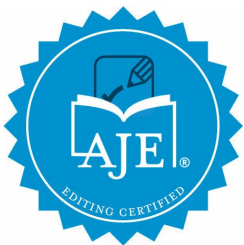

Neither the research content nor the authors' intentions were altered in any way during the editing process. Documents receiving this certification should be English-ready for publication; however, the author has the ability to accept or reject our suggestions and changes. To verify the final AJE edited version, please visit our verification page at [aje.com/certificate](#). If you have any questions or concerns about this edited document, please contact AJE at [support@aje.com](mailto:support@aje.com).
